# Supplementary material for: The impact of race, ethnicity, and obesity on CAR T-cell therapy outcomes
Source: PubMed Central journal article supplement — Blood Adv. 2022 Aug 10;6(23):6040–50. doi: 10.1182/bloodadvances.2022007676 (PMC9700270; doi:10.1182/bloodadvances.2022007676), 2022-08-10
Supplement: BLOODA_ADV-2022-007676-mmc1.pdf [file BLOODA_ADV-2022-007676-mmc1.pdf]

# The Impact of Ethnicity and Obesity on CAR T-cell Therapy Outcomes

## Supplemental Tables and Figures

### Table of Contents

|                                                                                        |          |
|----------------------------------------------------------------------------------------|----------|
| <b>SUPPLEMENTAL TABLES</b> .....                                                       | <b>2</b> |
| Table S1: Characteristics and Response of 11 Patients Treated with 2 CARs at NCI ..... | 2        |
| Table S2: CAR T-cell Outcomes by BMI Class .....                                       | 2        |
| Table S3: Cytokine Release Syndrome (Gr 3-5 vs. 0-2) of B-ALL Patients (n=139).....    | 3        |
| Table S4: Neurotoxicity of B-ALL Cohort (n=139) .....                                  | 3        |
| Table S5: Complete Remission of B-ALL Cohort (n=139) .....                             | 4        |
| Table S6: Toxicity and Response of MM and NHL Patients .....                           | 5        |
| <b>SUPPLEMENTAL FIGURES</b> .....                                                      | <b>5</b> |
| Figure S1: Correlation of Age and BMI among B-ALL Patients .....                       | 5        |
| Figure S2: CRS Severity by Treatment Year.....                                         | 7        |
| Figure S3: CRS Severity by Treatment Year for Hispanic Patients .....                  | 7        |
| Figure S4: Survival of Black B-ALL Patients.....                                       | 9        |

SUPPLEMENTAL TABLES

Table S1: Characteristics and Response of 11 Patients Treated with 2 CARs at NCI

| Ethnicity    | Sex | CAR #1  | CAR #2  | CAR Interval (Days) | Baseline Disease Burden #1 | Baseline Disease Burden #2 | BMI #1 | BMI #2 | Max CRS Grade #1 | Max CRS Grade #2 | NTX #1 | NTX #2 | MRD Neg CR #1 | MRD Neg CR #2 |
|--------------|-----|---------|---------|---------------------|----------------------------|----------------------------|--------|--------|------------------|------------------|--------|--------|---------------|---------------|
| Hispanic     | M   | CD19    | CD22    | 53                  | M3                         | M3                         | 21.7   | 20     | 0                | 3                | No     | Yes    | No            | No            |
| Hispanic     | M   | CD19    | CD22    | 404                 | M3                         | M1                         | 28.2   | 23.7   | 4                | 0                | Yes    | No     | Yes           | No            |
| Non-Hispanic | M   | CD19    | CD22    | 236                 | M3                         | M3                         | 15.6   | 16.4   | 1                | 2                | No     | No     | No            | No            |
| Hispanic     | F   | CD22    | CD19    | 217                 | M1                         | M3                         | 19.5   | 23     | 1                | 1                | No     | No     | Yes           | No            |
| Non-Hispanic | M   | CD19    | CD22    | 408                 | M1                         | M1                         | 24.6   | 26.5   | 1                | 1                | No     | No     | Yes           | Yes           |
| Non-Hispanic | M   | CD19    | CD22    | 108                 | M1                         | M3                         | 24.3   | 20.2   | 3                | 1                | Yes    | No     | Yes           | Yes           |
| Non-Hispanic | M   | CD19/22 | CD22    | 70                  | M3                         | M2                         | 19.9   | 20.1   | 0                | 2                | No     | No     | No            | Yes           |
| Non-Hispanic | M   | CD19/22 | CD22    | 59                  | M3                         | M3                         | 15.7   | 16     | 1                | 2                | No     | Yes    | No            | No            |
| Non-Hispanic | M   | CD22    | CD19/22 | 175                 | M1                         | M1                         | 19.1   | 20.5   | 3                | 0                | No     | No     | Yes           | Yes           |
| Non-Hispanic | F   | CD22    | CD22    | 813                 | M3                         | M3                         | 16.5   | 15.1   | 0                | 2                | No     | No     | No            | No            |
| Non-Hispanic | F   | CD22    | CD22    | 469                 | M1                         | M3                         | 19.6   | 18.8   | 1                | 1                | No     | No     | Yes           | Yes           |

Each CAR infusion was an independent treatment event (separate apheresis). CAR interval represents elapsed time between first and second CAR infusions. M = male, F = female, BMI = body mass index (kg/m<sup>2</sup>), CRS = cytokine release syndrome (ASTCT grade), NTX = neurotoxicity, MRD neg CR = measurable residual disease negative complete remission.

Table S2: CAR T-cell Outcomes by BMI Class

|  | Underweight (n=7) | Normal Weight (n=91) | Overweight (n=20) | Obese (n=21) |
|--|-------------------|----------------------|-------------------|--------------|
|  |                   |                      |                   |              |

|                            |          |           |           |           |
|----------------------------|----------|-----------|-----------|-----------|
| <b>ASTCT CRS Grade (%)</b> |          |           |           |           |
| <b>None</b>                | 1 (14.3) | 22 (24.2) | 6 (30.0)  | 4 (19.0)  |
| <b>1</b>                   | 2 (28.6) | 28 (30.8) | 11 (55.0) | 6 (28.6)  |
| <b>2</b>                   | 4 (57.1) | 23 (25.3) | 2 (10.0)  | 5 (23.8)  |
| <b>3</b>                   | 0 (0.0)  | 14 (15.4) | 1 (5.0)   | 5 (23.8)  |
| <b>4</b>                   | 0 (0.0)  | 4 (4.4)   | 0 (0.0)   | 1 (4.8)   |
| <b>Neurotoxicity (%)</b>   | 1 (14.3) | 20 (22.0) | 4 (20.0)  | 4 (19.0)  |
| <b>CR (%)</b>              |          |           |           |           |
| <b>Yes</b>                 | 6 (85.7) | 62 (68.1) | 11 (55.0) | 15 (71.4) |
| <b>No</b>                  | 1 (14.3) | 28 (30.8) | 9 (45.0)  | 6 (28.6)  |
| <b>Not Evaluable</b>       | 0 (0.0)  | 1 (1.1)   | 0 (0.0)   | 0 (0.0)   |

ASTCT = American Transplantation and Cellular Therapy Consortium, CRS = cytokine release syndrome, CR = complete remission. One patient with grade 4 CRS died due to grade 5 capillary leak syndrome and was not evaluable for CR.

| <b>Table S3: Cytokine Release Syndrome (Gr 3-5 vs. 0-2) of B-ALL Patients (n=139)</b> |                           |                |                           |                |
|---------------------------------------------------------------------------------------|---------------------------|----------------|---------------------------|----------------|
| <b>Variable (Risk Group vs. Ref)</b>                                                  | <b>Univariate</b>         |                | <b>Multivariable</b>      |                |
|                                                                                       | <b>OR (95% CI)</b>        | <b>p-value</b> | <b>OR (95% CI)</b>        | <b>p-value</b> |
| Age (yrs)                                                                             | <b>1.13 (1.06 - 1.21)</b> | <b>0.0002</b>  | <b>1.14 (1.05 - 1.24)</b> | <b>0.001</b>   |
| Ethnicity (Hispanic vs. non-Hispanic)                                                 | <b>2.84 (1.16 - 6.93)</b> | <b>0.02</b>    | <b>3.69 (1.29 - 10.6)</b> | <b>0.01</b>    |
| Disease Burden (M2/3 vs. M1)                                                          | <b>4.61 (1.30 - 16.3)</b> | <b>0.02</b>    | <b>5.54 (1.42 - 21.6)</b> | <b>0.01</b>    |
| BMI (Continuous)                                                                      | <b>1.1 (1.02 - 1.18)</b>  | <b>0.01</b>    | 1.01 (0.91 - 1.12)        | 0.85           |

OR = odds ratio, CI = confidence interval, B-ALL = B-cell acute lymphoblastic leukemia

| <b>Table S4: Neurotoxicity of B-ALL Cohort (n=139)</b> |                            |                |
|--------------------------------------------------------|----------------------------|----------------|
| <b>Variable (Risk Group vs. Ref)</b>                   | <b>Univariate</b>          |                |
|                                                        | <b>OR (95% CI)</b>         | <b>p-value</b> |
| Age (yrs)                                              | 1.04 (0.988 - 1.10)        | 0.13           |
| Sex (Male vs. Female)                                  | <b>3.17 (1.026 - 9.78)</b> | <b>0.04</b>    |

|                                                  |                     |      |
|--------------------------------------------------|---------------------|------|
| Race/Ethnicity (Hispanic vs. White non-Hispanic) | 0.95 (0.38 – 2.34)  | 0.92 |
| Other non-Hispanic vs. White non-Hispanic        | 0.33 (0.07 – 1.54)  | 0.16 |
| Prior HSCT (yes vs. no)                          | 1.18 (0.515 - 2.70) | 0.69 |
| Prior CART (yes vs. no)                          | 1.32 (0.58 – 3.0)   | 0.52 |
| Disease Burden (M2/3 vs. M1)                     | 1.80 (0.705 - 4.58) | 0.22 |
| BMI (O/O vs. Non O/O)                            | 0.89 (0.358 - 2.21) | 0.80 |
| Obese vs. non-obese                              | 0.88 (0.27 – 2.84)  | 0.82 |
| CAR (CD22 vs. CD19)                              | 1.36 (0.566 - 3.26) | 0.49 |
| CD19/22 vs. CD19                                 | 0.24 (0.028 - 1.99) | 0.18 |

OR = odds ratio, CI = confidence interval, O/O = overweight/obese, MM = multiple myeloma, ALL = B-cell acute lymphoblastic leukemia, NHL = B-cell non-Hodgkin lymphoma, HSCT = allogenic hematopoietic stem cell transplant, CAR = chimeric antigen receptor

| Table S5: Complete Remission of B-ALL Cohort (n=139) |                           |             |
|------------------------------------------------------|---------------------------|-------------|
| Variable (Risk Group vs. Ref)                        | Univariate                |             |
|                                                      | OR (95% CI)               | p-value     |
| Age (yrs)                                            | 1.02 (0.97 - 1.07)        | 0.49        |
| Sex (Male vs. Female)                                | 0.60 (0.26 - 1.37)        | 0.22        |
| Race/Ethnicity (Hispanic vs. White non-Hispanic)     | 0.67 (0.30 – 1.50)        | 0.33        |
| Other non-Hispanic vs. White non-Hispanic            | 0.81 (0.29 – 2.25)        | 0.67        |
| Prior HSCT (yes vs. no)                              | 0.72 (0.35 - 1.49)        | 0.37        |
| Prior CART (yes vs. no)                              | 0.94 (0.45 – 1.95)        | 0.86        |
| Disease Burden (M2/3 vs. M1)                         | <b>0.38 (0.16 - 0.88)</b> | <b>0.02</b> |
| BMI (O/O vs. Non O/O)                                | 0.74 (0.34 - 1.60)        | 0.44        |
| Obese vs. non-obese                                  | 1.20 (0.43 – 3.34)        | 0.72        |
| CAR (CD22 vs. CD19)                                  | 1.43 (0.67 - 3.08)        | 0.36        |

|                  |                    |      |
|------------------|--------------------|------|
| CD19/22 vs. CD19 | 2.15 (0.62 - 7.48) | 0.23 |
|------------------|--------------------|------|

OR = odds ratio, CI = confidence interval, O/O = overweight/obese, MM = multiple myeloma, ALL = B-cell acute lymphoblastic leukemia, NHL = B-cell non-Hodgkin lymphoma, HSCT = allogenic hematopoietic stem cell transplant, CAR = chimeric antigen receptor

| Table S6: Toxicity and Response of MM and NHL Patients |                |                |                     |                         |                      |
|--------------------------------------------------------|----------------|----------------|---------------------|-------------------------|----------------------|
|                                                        |                | Ethnicity      |                     | BMI                     |                      |
| NHL (%)                                                | Overall (n=23) | Hispanic (n=2) | non-Hispanic (n=21) | Overweight/Obese (n=13) | Normal Weight (n=10) |
| Severe CRS                                             | 6 (26.1)       | 1 (50.0)       | 5 (23.8)            | 5 (38.5)                | 1 (10.0)             |
| Developed Neurotoxicity                                | 3 (13.0)       | 1 (50.0)       | 2 (9.5)             | 3 (23.1)                | 0                    |
| CR                                                     | 10 (43.5)      | 1 (50.0)       | 9 (42.9)            | 7 (53.8)                | 3 (30.0)             |
| MM (%)                                                 | Overall (n=24) | Hispanic (n=3) | non-Hispanic (n=21) | Overweight/Obese (n=17) | Normal Weight (n=7)  |
| Severe CRS                                             | 6 (25.0)       | 1 (33.3)       | 5 (23.8)            | 4 (23.5)                | 2 (28.6)             |
| Developed Neurotoxicity                                | 3 (12.5)       | 0              | 3 (14.3)            | 3 (17.6)                | 0                    |
| CR                                                     | 2 (8.3)        | 0              | 2 (9.5)             | 1 (5.9)                 | 1 (14.3)             |

Severe CRS defined as grade  $\geq 3$  by ASTCT criteria. NHL = non-Hodgkin lymphoma, MM = multiple myeloma, BMI = body mass index, CRS = cytokine release syndrome, CR = complete remission

## SUPPLEMENTAL FIGURES

Figure S1: Correlation of Age and BMI among B-ALL Patients

## B-ALL BMI on Age

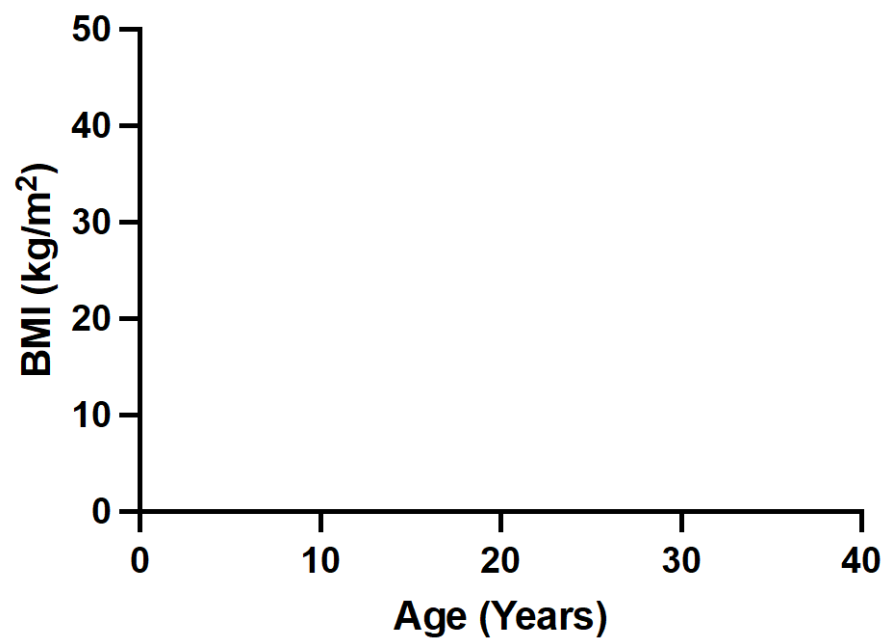

Scatterplot showing the relationship between body mass index (BMI) and age among B-ALL patients.  $R^2=0.33$

Figure S2: CRS Severity by Treatment Year

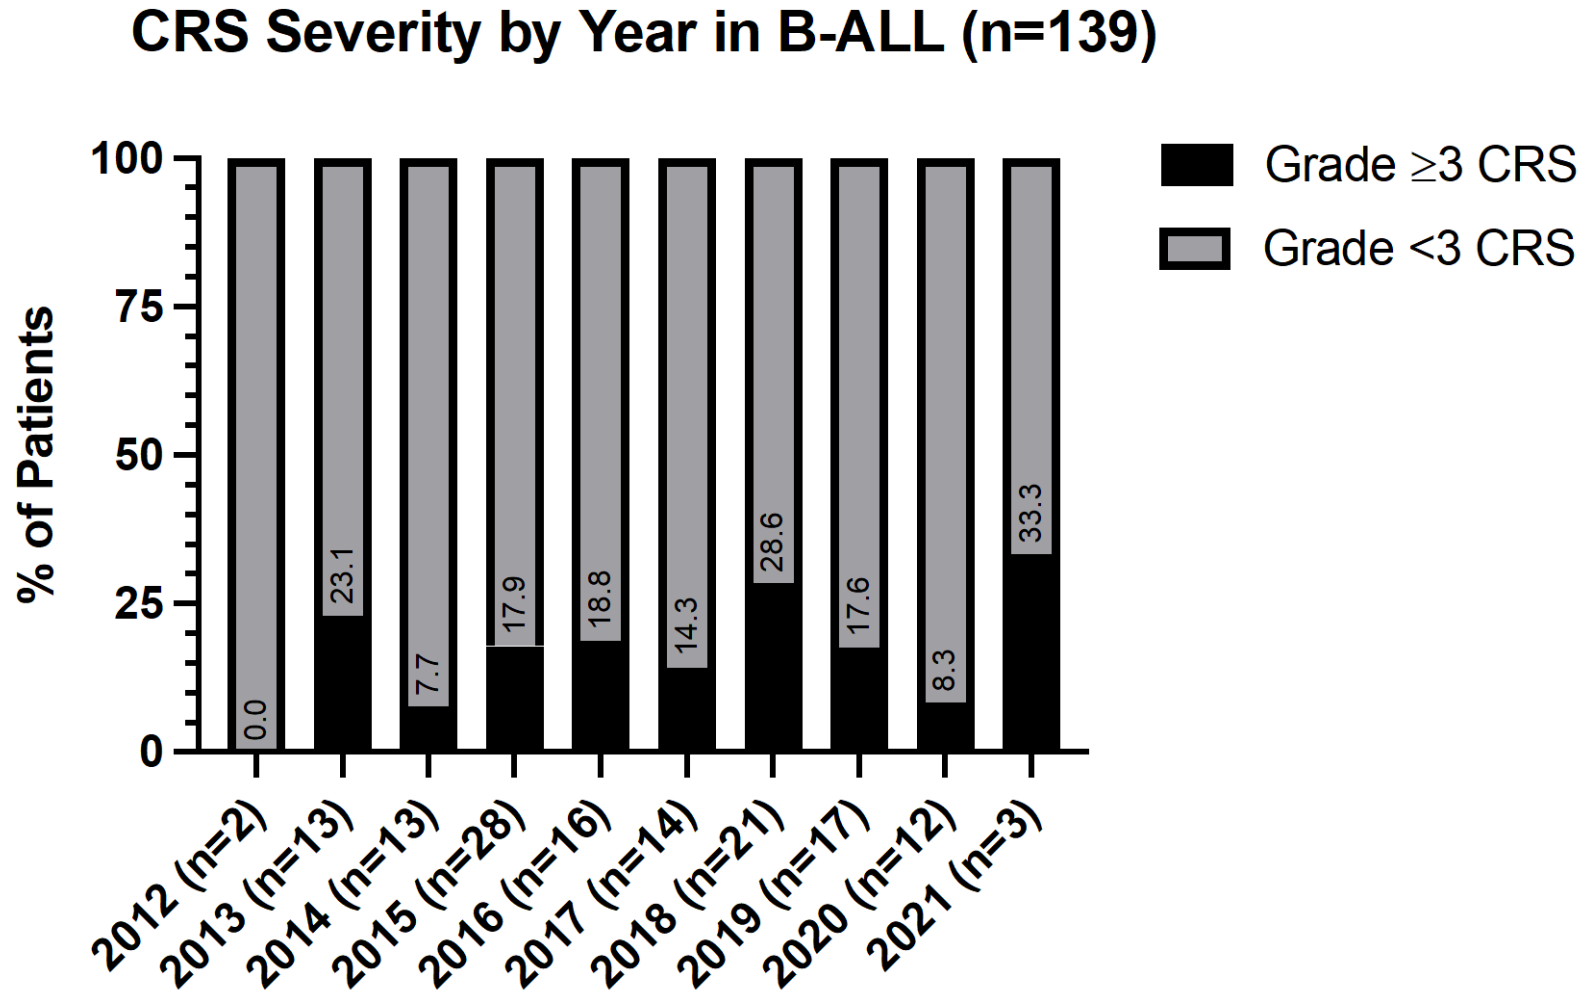

**Figure S3:** Percentage of B-ALL patients who experienced severe (grade  $\geq 3$ ) CRS by year of treatment. Patients included in this analysis were treated from July 2012 to March 2021. Chi-Square p-value = 0.87. CRS = cytokine release syndrome.

Figure S3: CRS Severity by Treatment Year for Hispanic Patients

# CRS Severity by Year in Hispanic B-ALL Patients (n=40)

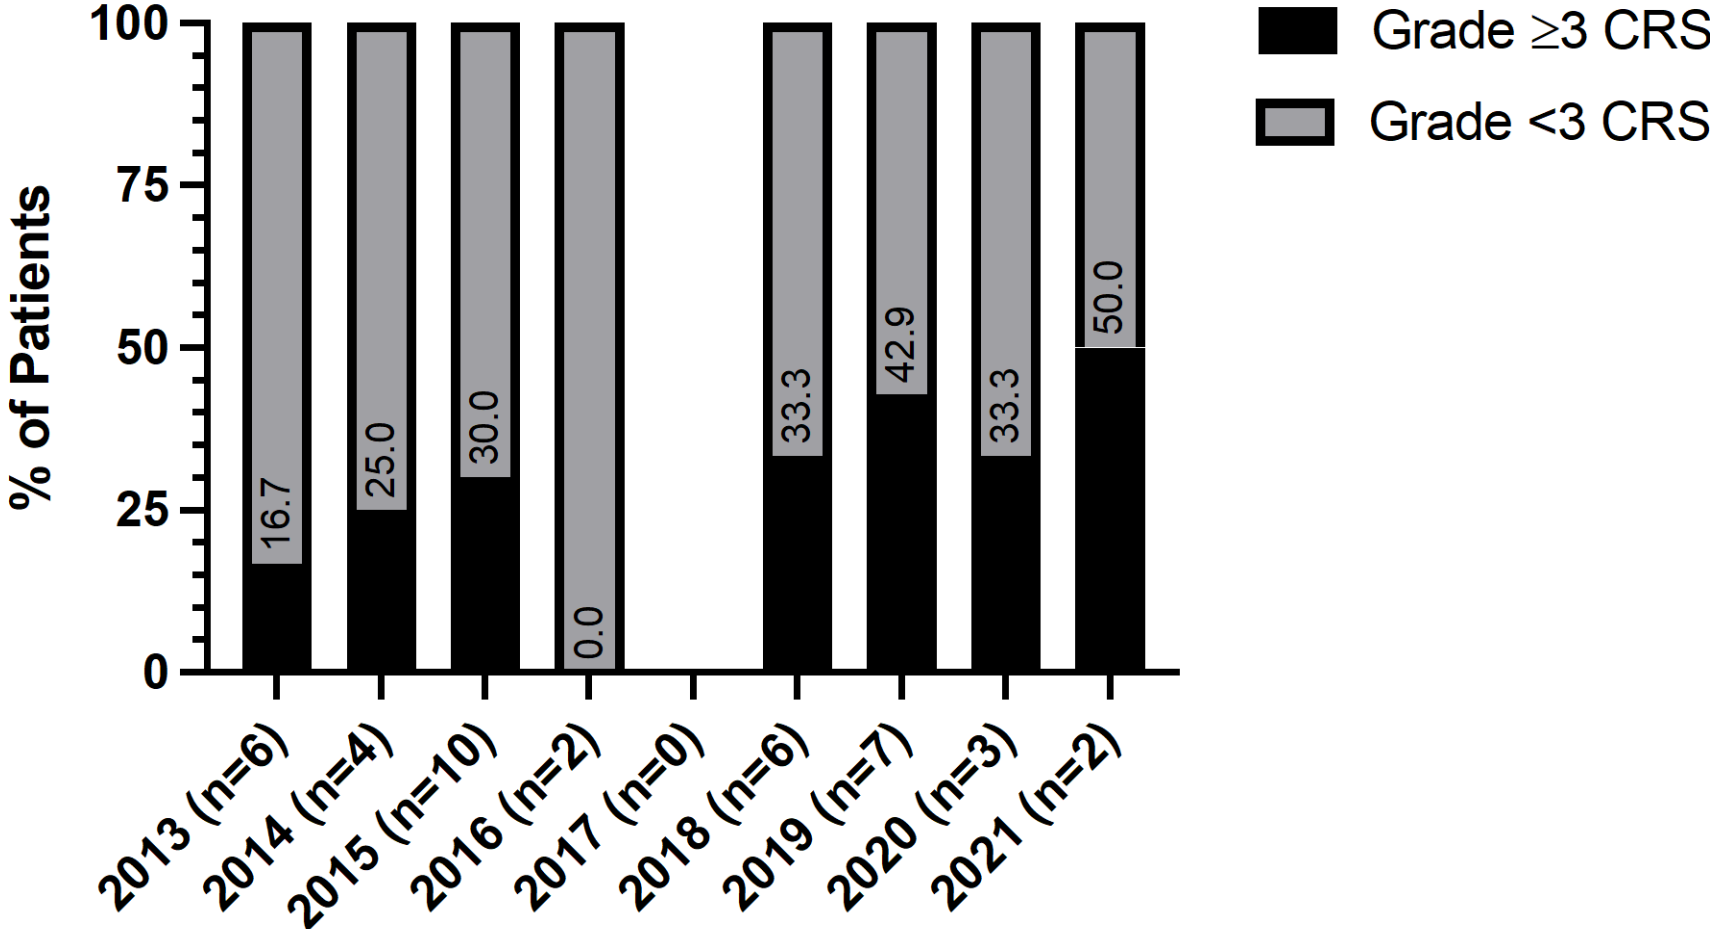

Percentage of Hispanic B-ALL patients who experienced severe (grade  $\geq 3$ ) CRS by year of treatment. CRS = cytokine release syndrome.



Figure S4: Survival of Black B-ALL Patients

## B-ALL Survival of Black Patients (n=5)

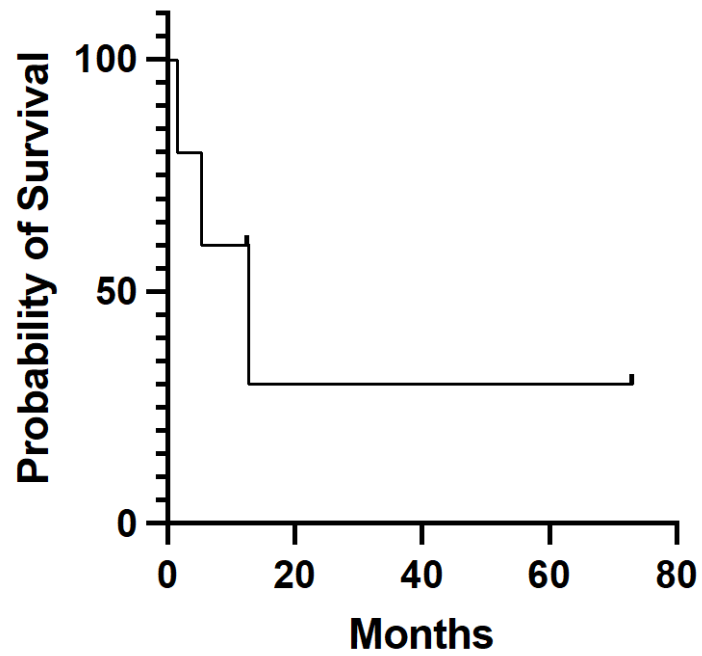

Kaplan-Meier Survival Curve of 5 Black or African American B-ALL patients. Index date (t=0) time of CAR T-cell infusion
